# Supplementary material for: Healthy donor T cell responses to common cold coronaviruses and SARS-CoV-2
Source: JCI journal article supplement (doi:10.1172/jci143120), 2020-09-23
Supplement: sd3 [file 3]

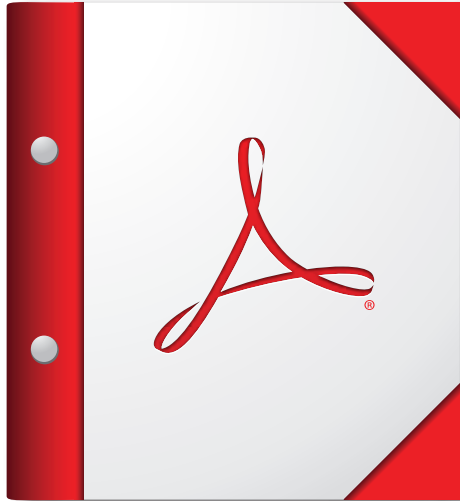

**For the best experience, open this PDF portfolio in  
Acrobat X or Adobe Reader X, or later.**

[Get Adobe Reader Now!](#)
